# Supplementary material
Source: PubMed Central journal article supplement (PMC5386816)
Supplement: NIHMS842018-supplement-supplement_1.pdf [file NIHMS842018-supplement-supplement_1.pdf]

**Supplemental Materials: For Online Publication Only**

**Supplemental Table 1.** Comparisons of BMD Z-scores in anorexia nervosa (AN) participants and healthy controls (C) across weight parameters and cut-offs

| BMD Z-scores | Column A            | Column B              | Column C           | P values |         |         |         |
|--------------|---------------------|-----------------------|--------------------|----------|---------|---------|---------|
|              | Anorexia nervosa    |                       | Controls           | ANOVA    | A vs. B | B vs. C | A vs. C |
|              | <b>BMI ≤17.5</b>    | <b>BMI &gt;17.5</b>   |                    |          |         |         |         |
| <b>WBLH</b>  | -1.02±0.08<br>(131) | -1.03±0.09<br>(107)   | -0.41±0.10<br>(87) | <0.0001  | 1.00    | <0.0001 | <0.0001 |
| <b>Spine</b> | -0.99±0.08<br>(139) | -0.99±0.09<br>(119)   | -0.04±0.10<br>(90) | <0.0001  | 1.00    | <0.0001 | <0.0001 |
| <b>Hip</b>   | -0.91±0.09<br>(119) | -0.74±0.09<br>(115)   | 0.13±0.12<br>(68)  | <0.0001  | 0.43    | <0.0001 | <0.0001 |
|              | <b>BMI ≤18.5</b>    | <b>BMI &gt;18.5</b>   |                    |          |         |         |         |
| <b>WBLH</b>  | -1.03±0.06<br>(195) | -1.02±0.14<br>(43)    | -0.41±0.10         | <0.0001  | 1.00    | 0.0015  | <0.0001 |
| <b>Spine</b> | -0.98±0.07<br>(214) | -0.98±0.15<br>(44)    | -0.04±0.10         | <0.0001  | 1.00    | <0.0001 | <0.0001 |
| <b>Hip</b>   | -0.86±0.07<br>(190) | -0.80±0.15<br>(44)    | 0.13±0.12          | <0.0001  | 0.62    | <0.0001 | <0.0001 |
|              | <b>BMI ≤5 %ile</b>  | <b>BMI &gt;5%ile</b>  |                    |          |         |         |         |
| <b>WBLH</b>  | -1.09±0.0<br>(100)  | -0.98±0.08<br>(138)   | -0.41±0.10         | <0.0001  | 0.67    | <0.0001 | <0.0001 |
| <b>Spine</b> | -1.16±0.09<br>(109) | -0.87±0.08<br>(149)   | -0.04±0.10         | <0.0001  | 0.07    | <0.0001 | <0.0001 |
| <b>Hip</b>   | -1.00±0.10<br>(194) | -0.71±0.08<br>(140)   | 0.13±0.12          | <0.0001  | 0.08    | <0.0001 | <0.0001 |
|              | <b>BMI ≤10 %ile</b> | <b>BMI &gt;10%ile</b> |                    |          |         |         |         |
| <b>WBLH</b>  | -1.12±0.07<br>(148) | -0.87±0.09<br>(90)    | -0.41±0.10         | <0.0001  | 0.11    | <0.0001 | <0.0001 |
| <b>Spine</b> | -1.10±0.08<br>(165) | -0.80±0.10<br>(93)    | -0.04±0.10         | <0.0001  | 0.07    | <0.0001 | <0.0001 |
| <b>Hip</b>   | -0.95±0.08<br>(146) | -0.63±0.10<br>(88)    | 0.13±0.12          | <0.0001  | 0.047   | <0.0001 | <0.0001 |

| BMD Z-scores | Column A            | Column B            | Column C       | P values |         |         |         |
|--------------|---------------------|---------------------|----------------|----------|---------|---------|---------|
|              | Anorexia nervosa    |                     | Controls       | ANOVA    | A vs. B | B vs. C | A vs. C |
|              | $\leq 85\%$ mBMI    | $> 85\%$ mBMI       |                |          |         |         |         |
| <b>WBLH</b>  | -1.12±0.07<br>(141) | -0.89±0.09<br>(97)  | -<br>0.41±0.10 | <0.0001  | 0.16    | 0.0015  | <0.0001 |
| <b>Spine</b> | -1.12±0.08<br>(158) | -0.79±0.10<br>(100) | -<br>0.04±0.10 | <0.0001  | 0.03    | <0.0001 | <0.0001 |
| <b>Hip</b>   | -0.97±0.08<br>(139) | -0.62±0.10<br>(95)  | 0.13±0.12      | <0.0001  | 0.03    | <0.0001 | <0.0001 |
|              | $\leq 90\%$ mBMI    | $> 90\%$ mBMI       |                |          |         |         |         |
| <b>WBLH</b>  | -1.03±0.06<br>(225) | -0.98±0.26<br>(13)  | -<br>0.41±0.10 | <0.0001  | 0.98    | 0.1056  | <0.0001 |
| <b>Spine</b> | -0.98±0.06<br>(245) | -1.11±0.28<br>(13)  | -<br>0.04±0.10 | <0.0001  | 0.91    | <0.0001 | 0.0017  |
| <b>Hip</b>   | -0.83±0.06<br>(221) | -0.71±0.28<br>(13)  | 0.13±0.12      | <0.0001  | 0.90    | 0.0167  | <0.0001 |
|              | $\leq 85\%$ EBW-Ht  | $> 85\%$ EBW-Ht     |                |          |         |         |         |
| <b>WBLH</b>  | -1.21±0.06<br>(171) | -0.56±0.10<br>(68)  | -<br>0.41±0.10 | <0.0001  | <0.0001 | 0.55    | <0.0001 |
| <b>Spine</b> | -1.24±0.07<br>(183) | -0.38±0.11<br>(76)  | -<br>0.04±0.10 | <0.0001  | <0.0001 | 0.06    | <0.0001 |
| <b>Hip</b>   | -1.08±0.07<br>(164) | -0.27±0.11<br>(71)  | 0.13±0.12      | <0.0001  | <0.0001 | 0.03    | <0.0001 |
|              | $\leq 90\%$ EBW-Ht  | $> 90\%$ EBW-Ht     |                |          |         |         |         |
| <b>WBLH</b>  | -1.09±0.06<br>(211) | -0.52±0.17<br>(28)  | -<br>0.41±0.10 | <0.0001  | <0.0001 | 0.83    | <0.0001 |
| <b>Spine</b> | -1.07±0.06<br>(228) | -0.43±0.18<br>(31)  | -<br>0.04±0.10 | <0.0001  | 0.0034  | 0.17    | <0.0001 |
| <b>Hip</b>   | -0.91±0.06<br>(204) | -0.30±0.17<br>(31)  | 0.13±0.12      | <0.0001  | 0.0041  | 0.11    | <0.0001 |

WBLH: Whole body less head  
 %mBMI: Percent median BMI  
 EBW-Ht: Expected body weight for height

**Supplemental Table 2.** Comparisons of BMD Z-scores across anorexia nervosa (AN) participants based on absolute BMI values (mild, moderate, severe, and extreme malnutrition) and controls

| BMD Z-scores | AN participants                   |                    |                      |                     | Controls           | P                              |
|--------------|-----------------------------------|--------------------|----------------------|---------------------|--------------------|--------------------------------|
|              | Absolute BMI (kg/m <sup>2</sup> ) |                    |                      |                     |                    |                                |
|              | <15<br>Extreme                    | 15-15.99<br>Severe | 16-16.99<br>Moderate | ≥17<br>Mild         |                    |                                |
| <b>WBLH</b>  | -1.46±0.25<br>(13)                | -1.32±0.17<br>(28) | -0.88±0.12<br>(59)   | -0.99±0.07<br>(138) | -0.41±0.10<br>(87) | <0.0001 <sup>c,d,g,h</sup>     |
| <b>Spine</b> | -1.37±0.27<br>(14)                | -1.16±0.19<br>(28) | -0.92±0.12<br>(64)   | -0.95±0.08<br>(152) | -0.04±0.10<br>(90) | <0.0001 <sup>a,b,c,d</sup>     |
| <b>Hip</b>   | -1.30±0.27<br>(13)                | -1.43±0.20<br>(24) | -0.70±0.13<br>(53)   | -0.73±0.08<br>(144) | 0.13±0.12<br>(68)  | <0.0001 <sup>a,b,c,d,e,f</sup> |

WBLH: Whole body less head

P≤0.0001 for

<sup>a</sup>AN with BMI <15 vs. Controls

<sup>b</sup>AN with BMI between 15-15.99 vs. Controls

<sup>c</sup>AN with BMI between 16-16.99 vs. Controls; and

<sup>d</sup>AN with BMI ≥17 vs. Controls

P<0.05 for

<sup>e</sup>AN with BMI between 15-15.99 vs. AN with BMI ≥17;

<sup>f</sup>AN with BMI between 15-15.99 vs. AN with BMI between 16-16.99;

<sup>g</sup>AN with BMI between 15-15.99 vs. Controls;

<sup>h</sup>AN with BMI <15 vs. Controls

**Supplemental Table 3.** Comparisons of BMD Z-scores across anorexia nervosa (AN) participants based on percent median BMI [moderate/severe (<80% mBMI) and mild (80-90% mBMI) malnutrition, and >90% mBMI] and controls

| BMD Z-scores | AN participants                |                     |                    | Controls           | P                             |
|--------------|--------------------------------|---------------------|--------------------|--------------------|-------------------------------|
|              | Percent median BMI             |                     |                    |                    |                               |
|              | <80<br>Moderate and<br>severe* | 80-90<br>Mild       | >90                |                    |                               |
| <b>WBLH</b>  | -1.15±0.10<br>(80)             | -0.96±0.07<br>(145) | -0.98±0.26<br>(13) | -0.41±0.10<br>(87) | <0.0001 <sup>a, b</sup>       |
| <b>Spine</b> | -1.25±0.10<br>(88)             | -0.84±0.08<br>(157) | -1.11±0.28<br>(13) | -0.04±0.10<br>(90) | <0.0001 <sup>a, b, c, d</sup> |
| <b>Hip</b>   | -1.06±0.11<br>(79)             | -0.71±0.08<br>(142) | -0.71±0.27<br>(13) | 0.13±0.12<br>(68)  | <0.0001 <sup>a, b, c</sup>    |

WBLH: Whole body less head

p<0.0001 for

<sup>a</sup>AN <80% vs. Controls;

<sup>b</sup>AN 80-90% vs Controls

p<0.05 for

<sup>c</sup>AN>90% vs. Controls;

<sup>d</sup>AN <80% vs. AN 80-90%

\*Please note that eliminating the AN girls with severe weight loss (%mBMI<70% (n=8) did not change our overall findings

**Supplemental Table 4.** Comparisons of BMD Z-scores across anorexia nervosa (AN) participants based on BMI Z-scores [severe ( $\leq -3$ ), moderate (-2 to -2.9) and mild (-1 to -1.9) malnutrition] and controls

| BMD Z-scores | AN participants          |                          |                           |                          | Controls                 | P                              |
|--------------|--------------------------|--------------------------|---------------------------|--------------------------|--------------------------|--------------------------------|
|              | BMI Z-scores             |                          |                           |                          |                          |                                |
|              | $\leq -3$<br>Severe      | -2 to -2.9<br>Moderate   | -1 to -1.9<br>Mild        | $> -1$                   |                          |                                |
| <b>WBLH</b>  | -1.45 $\pm$ 0.19<br>(23) | -1.16 $\pm$ 0.13<br>(44) | -1.0 $\pm$ 0.08<br>(125)  | -0.85 $\pm$ 0.15<br>(38) | -0.41 $\pm$ 0.10<br>(87) | <0.0001 <sup>a,b,c</sup>       |
| <b>Spine</b> | -1.52 $\pm$ 0.20<br>(24) | -1.24 $\pm$ 0.14<br>(50) | -0.88 $\pm$ 0.08<br>(137) | -0.73 $\pm$ 0.16<br>(39) | -0.04 $\pm$ 0.10<br>(90) | <0.0001 <sup>a,b,c,d,e,f</sup> |
| <b>Hip</b>   | -1.52 $\pm$ 0.21<br>(22) | -0.93 $\pm$ 0.14<br>(46) | -0.78 $\pm$ 0.08<br>(121) | -0.52 $\pm$ 0.16<br>(37) | 0.13 $\pm$ 0.12<br>(68)  | <0.0001 <sup>a,b,c,d,e,f</sup> |

WBLH: Whole body less head

p $\leq$  0.0002 for

<sup>a</sup>AN with BMI Z-scores  $\leq -3$  vs. Controls

<sup>b</sup>AN with BMI Z-scores between -2 to -2.99 vs. Controls

<sup>c</sup>AN with BMI Z-scores between -1 to -1.9 vs. Controls

p<0.05 for

<sup>d</sup>AN with BMI Z-scores  $> -1$  vs. Controls

<sup>e</sup>AN with BMI Z-scores  $\leq -3$  vs. AN with BMI Z-scores between -1 to -1.9

<sup>f</sup>AN with BMI Z-scores  $\leq -3$  vs. AN with BMI Z-scores  $> -1$
